# Supplementary material
Source: publisher figshare collection journal article supplement (https://asha.figshare.com/articles/dataset/_/13564709)
Supplement: Supplementary file [file 1]

## Supplemental Material S2. Supplemental analyses.

We analyzed our data in two ways: 1) using a  $2 \times 2$  ANOVA for each dependent variable as was done with the Oetting et al. (2019) probe data from the same children, and 2) using a logistic regression with a binomial distribution on the proportions calculated with the unmodified and strategic scoring approaches. As with ANOVA, what enters the numerator and denominator of the proportions varied by definition of the unmodified and strategic scoring approach. We calculated the likelihood ratio Chi-squared for both the main effects of group and dialect and their interactions.

The logistic regression has the advantage of not having to conform to the assumptions of normality and homogeneity of variance of the ANOVA. While the homogeneity of variance assumption is not a large concern when groups are equal (as was our case for the group variable—there were 53 children in both the SLI and TD groups), it can lead to a lower ability to find differences if the larger group shows higher variability—which would be the case if AAE speakers ( $n = 70$ ) had higher variability than SWE speakers ( $n = 36$ ). Thus, the logistic regression may be able to detect some significant findings relevant to the dialect factor or its interaction that the ANOVA was not able to detect due to violations of homogeneity of variance.

In many cases the two analyses showed similar results; but on some occasions, the logistic regression found an additional significant effect of the interaction between group and dialect. In each of these cases, the groups continued to differ within each dialect, but the effect was larger in the SWE speakers than the AAE speakers. Finding larger clinical group effects in SWE than in AAE was also found with some of the ANOVAs, and it has been found in most of our previous studies with these same participants (McDonald & Oetting, 2019; McDonald et al., 2018; Oetting et al., 2019).

### Statistics for the logistic regression

#### All structures considered together

|                                                                                          | Chi Squared | df | $p \leq$ |
|------------------------------------------------------------------------------------------|-------------|----|----------|
| Unmodified scoring—same as ANOVA                                                         |             |    |          |
| Group                                                                                    | 456.947     | 1  | .001     |
| Dialect                                                                                  | 330.222     | 1  | .001     |
| Interaction                                                                              | 74.971      | 1  | .001     |
| Strategic scoring—additional finding of an interaction that had been at .06 in the ANOVA |             |    |          |
| Group                                                                                    | 466.909     | 1  | .001     |
| Dialect                                                                                  | 218.078     | 1  | .001     |
| Interaction                                                                              | 91.342      | 1  | .002     |

#### Past tense

Unmodified scoring—additional finding of an interaction that at been at .16 in the ANOVA

|             |         |   |      |
|-------------|---------|---|------|
| Group       | 195.131 | 1 | .001 |
| Dialect     | 118.212 | 1 | .001 |
| Interaction | 27.030  | 1 | .001 |

Strategic scoring—additional finding of an interaction that at been at .15 in the ANOVA

|             |         |   |      |
|-------------|---------|---|------|
| Group       | 208.087 | 1 | .001 |
| Dialect     | 27.442  | 1 | .001 |
| Interaction | 27.342  | 1 | .001 |

Third person singular

Unmodified scoring—same as ANOVA

|             |         |   |      |
|-------------|---------|---|------|
| Group       | 204.624 | 1 | .001 |
| Dialect     | 184.390 | 1 | .001 |
| Interaction | 10.792  | 1 | .001 |

Strategic scoring—additional finding of an interaction that had been at .06 in the ANOVA

|             |         |   |      |
|-------------|---------|---|------|
| Group       | 199.074 | 1 | .001 |
| Dialect     | 223.941 | 1 | .001 |
| Interaction | 14.925  | 1 | .001 |

BE present

Unmodified scoring—same as ANOVA

|             |         |   |      |
|-------------|---------|---|------|
| Group       | 37.702  | 1 | .001 |
| Dialect     | 146.313 | 1 | .001 |
| Interaction | 2.014   | 1 | .156 |

Strategic scoring—same as ANOVA

|             |         |   |      |
|-------------|---------|---|------|
| Group       | 37.089  | 1 | .001 |
| Dialect     | 145.706 | 1 | .001 |
| Interaction | 2.346   | 1 | .126 |

BE past

Unmodified scoring—same as ANOVA

|             |       |   |      |
|-------------|-------|---|------|
| Group       | .246  | 1 | .620 |
| Dialect     | 2.914 | 1 | .088 |
| Interaction | .291  | 1 | .589 |

Strategic scoring—same as ANOVA

|             |       |   |      |
|-------------|-------|---|------|
| Group       | .807  | 1 | .369 |
| Dialect     | 6.994 | 1 | .008 |
| Interaction | 1.586 | 1 | .208 |
