# Supplementary material
Source: publisher figshare collection journal article supplement (https://asha.figshare.com/articles/dataset/_/13564709)
Supplement: Supplementary file [file 1]

**Supplemental Material S1.** Examples of regular past tense form types and scoring approaches.

AAE-speaking child classified as SLI #967

| Regular Past Tense Form Types |                                      |                                                 |
|-------------------------------|--------------------------------------|-------------------------------------------------|
| Type of Form                  | Frequency                            | Verb                                            |
| Mainstream Overt              | 3                                    | bump/ed, bump/ed, bump/ed                       |
| Nonmainstream Overt           | 0                                    | --                                              |
| Nonmainstream Zero            | 7                                    | bumpØ, bumpØ, washØ, dieØ, openØ, pooØ, finishØ |
| Other                         | 1                                    | ...gonna bump/ed his head.                      |
| Scoring Approach              |                                      |                                                 |
| Unmodified                    | $3/(3 + 0 + 7 + 1) = 27\%$           |                                                 |
| Modified                      | $(3 + 0 + 7)/(3 + 0 + 7 + 1) = 91\%$ |                                                 |
| Strategic                     | $(3 + 0)/(3 + 0 + 7) = 30\%$         |                                                 |

AAE-speaking children classified as TD #715

| Regular Past Tense Form Types |                                           |                                                                                                                                                                |
|-------------------------------|-------------------------------------------|----------------------------------------------------------------------------------------------------------------------------------------------------------------|
| Type of Form                  | Frequency                                 | Verb                                                                                                                                                           |
| Mainstream Overt              | 13                                        | want/ed, happen/ed, pee/ed, poo/ed, poo/ed, mix/ed, happen/ed, hate/ed, mess/ed, mess/ed, start/ed, ask/ed, start/ed                                           |
| Nonmainstream Overt           | 13                                        | had poo/ed, had back, had die/ed, had laugh, had whoop/ed, had drop/ed, had die/ed, had step/ed, had die/ed, had jump/ed, had punch, had punch/ed, had die/ed, |
| Nonmainstream Zero            | 3                                         | stopØ, tripØ, bustØ                                                                                                                                            |
| Other                         | 0                                         | --                                                                                                                                                             |
| Scoring Approach              |                                           |                                                                                                                                                                |
| Unmodified                    | $13/(13 + 13 + 3 + 0) = 45\%$             |                                                                                                                                                                |
| Modified                      | $(13 + 13 + 3)/(13 + 13 + 3 + 0) = 100\%$ |                                                                                                                                                                |
| Strategic                     | $(13 + 13)/(13 + 13 + 3) = 90\%$          |                                                                                                                                                                |

SWE-speaking children classified as SLI #781

| Regular Past Tense Form Types |                                      |                                                 |
|-------------------------------|--------------------------------------|-------------------------------------------------|
| Type of Form                  | Frequency                            | Verb                                            |
| Mainstream Overt              | 3                                    | scare/ed, bump/ed, happen/ed                    |
| Nonmainstream Overt           | 1                                    | had happen/ed                                   |
| Nonmainstream Zero            | 4                                    | wantØ, popØ, popØ, happenØ                      |
| Other                         | 1                                    | every day we use/ed (context: every day we use) |
| Scoring Approach              |                                      |                                                 |
| Unmodified                    | $3/(3 + 1 + 4 + 1) = 33\%$           |                                                 |
| Modified                      | $(3 + 1 + 4)/(3 + 1 + 4 + 1) = 89\%$ |                                                 |
| Strategic                     | $(3 + 1)/(3 + 1 + 4) = 50\%$         |                                                 |

SWE-speaking child classified as TD #888

| Regular Past Tense Form Types |                                         |                                                                                                                                                              |
|-------------------------------|-----------------------------------------|--------------------------------------------------------------------------------------------------------------------------------------------------------------|
| Type of Form                  | Frequency                               | Verb                                                                                                                                                         |
| Mainstream Overt              | 17                                      | help/ed, stop/ed, close/ed, pass/ed, walk/ed, turn/ed, potty/ed, turn/ed, punch/ed, happen/ed, scream/ed, need/ed, want/ed, ask/ed, ask/ed, step/ed, trip/ed |
| Nonmainstream Overt           | 1                                       | had punch/ed                                                                                                                                                 |
| Nonmainstream Zero            | 0                                       | --                                                                                                                                                           |
| Other                         | 0                                       | --                                                                                                                                                           |
| Scoring Approach              |                                         |                                                                                                                                                              |
| Unmodified                    | $17/(17 + 1 + 0 + 0) = 94\%$            |                                                                                                                                                              |
| Modified                      | $(17 + 1 + 0)/(17 + 1 + 0 + 0) = 100\%$ |                                                                                                                                                              |
| Strategic                     | $(17 + 1)/(17 + 1 + 0) = 100\%$         |                                                                                                                                                              |
